# Supplementary material for: A four-gene signature predicts survival in clear-cell renal-cell carcinoma
Source: PubMed Central journal article supplement (PMC5347726; doi:10.18632/oncotarget.12631), 2016-10-13
Supplement: oncotarget-07-82712-s001.pdf [file oncotarget-07-82712-s001.pdf]

## A four-gene signature predicts survival in clear-cell renal-cell carcinoma

### SUPPLEMENTARY TABLE

Supplementary Table S1:

| PTEN | PIK3C2A | ITPA | BCL3 | Risk |
|------|---------|------|------|------|
| +    | +       | -    | -    | Low  |
| +    | -       | -    | -    | Low  |
| +    | +       | +    | -    | Low  |
| +    | +       | -    | +    | Low  |
| -    | +       | -    | -    | Low  |
| +    | +       | +    | +    | High |
| +    | -       | +    | -    | High |
| +    | -       | -    | +    | High |
| -    | +       | +    | -    | High |
| -    | +       | -    | +    | High |
| -    | -       | -    | -    | High |
| +    | -       | +    | +    | High |
| -    | +       | +    | +    | High |
| -    | -       | -    | +    | High |
| -    | -       | +    | -    | High |
| -    | -       | +    | +    | High |
